# Supplementary material
Source: HighWire-hosted journal article supplement (https://www.cmaj.ca/highwire/filestream/148899/field_highwire_adjunct_files/6/221512-res-7-at.pdf)
Supplement: 221512-res-7-at.pdf [file 221512-res-7-at.pdf]

**Supplementary Table 6: IRR of top cancers in Alberta (all stages combined) during state of emergency, compared to the incidence rate before COVID, and the post-SOE monthly recovery rate under the alternative model with 2-month SOE and 7-month post-SOE recovery**

|         |                   |                    |                    |                   |                   |
|---------|-------------------|--------------------|--------------------|-------------------|-------------------|
| IRR     | Bladder           | Breast             | Colorectal         | Kidney            | NHL               |
| SOE     | 0.88 (0.73, 1.06) | 0.63 (0.56, 0.72)* | 0.61 (0.52, 0.70)* | 0.92 (0.71, 1.19) | 1.00 (0.82, 1.21) |
| PostSOE | 1.00 (0.97, 1.04) | 1.09 (1.06, 1.12)* | 1.08 (1.05, 1.11)* | 1.00 (0.94, 1.05) | 0.97 (0.93, 1.00) |
|         | Lung              | Melanoma           | Prostate           | Uterus            | Cervix            |
| SOE     | 0.93 (0.82, 1.05) | 0.53 (0.43, 0.65)* | 0.60 (0.53, 0.69)* | 0.85 (0.68, 1.06) | 1.16 (0.73, 1.83) |
| PostSOE | 1.02 (0.99, 1.04) | 1.09 (1.05, 1.14)* | 1.08 (1.05, 1.11)* | 1.04 (0.99, 1.08) | 0.97 (0.89, 1.06) |

SOE: estimated as the exponent of  $\beta_3$ ; PostSOE: estimated as the exponent of  $\beta_4$ .

**Table 67: Missed cancer diagnoses during March 2020 to December 2020, modeled as the difference between the counterfactual cancer diagnoses had COVID not occurred and the modeled diagnoses under the alternative model with 2-month SOE and 7-month post-SOE recovery**

| Cancer     | Modeled           | Counterfactual    | Difference      |
|------------|-------------------|-------------------|-----------------|
| Bladder    | 630 (585, 673)    | 712 (632, 800)    | 82 (-14, 187)   |
| Breast     | 1962 (1883, 2040) | 2312 (2165, 2461) | 350 (172, 531)* |
| Cervix     | 122 (103, 141)    | 116 (85, 155)     | -6 (-45, 40)    |
| Colorectal | 1415 (1343, 1485) | 1811 (1681, 1948) | 397 (240, 570)* |
| Kidney     | 416 (381, 451)    | 458 (396, 527)    | 42 (-32, 122)   |
| Lung       | 1637 (1568, 1708) | 1674 (1556, 1803) | 37 (-110, 194)  |
| Melanoma   | 577 (537, 619)    | 800 (715, 898)    | 223 (122, 336)* |
| NHL        | 619 (577, 663)    | 695 (615, 789)    | 76 (-20, 185)   |
| Prostate   | 1794 (1720, 1867) | 2275 (2135, 2431) | 481 (313, 667)* |
| Uterus     | 520 (481, 557)    | 542 (473, 619)    | 22 (-63, 114)   |
